# Supplementary material for: Hidden hearing loss is associated with loss of ribbon synapses of cochlea inner hair cells
Source: PubMed Central journal article supplement (PMC8035623; doi:10.1042/bsr20201637), 2021-04-09

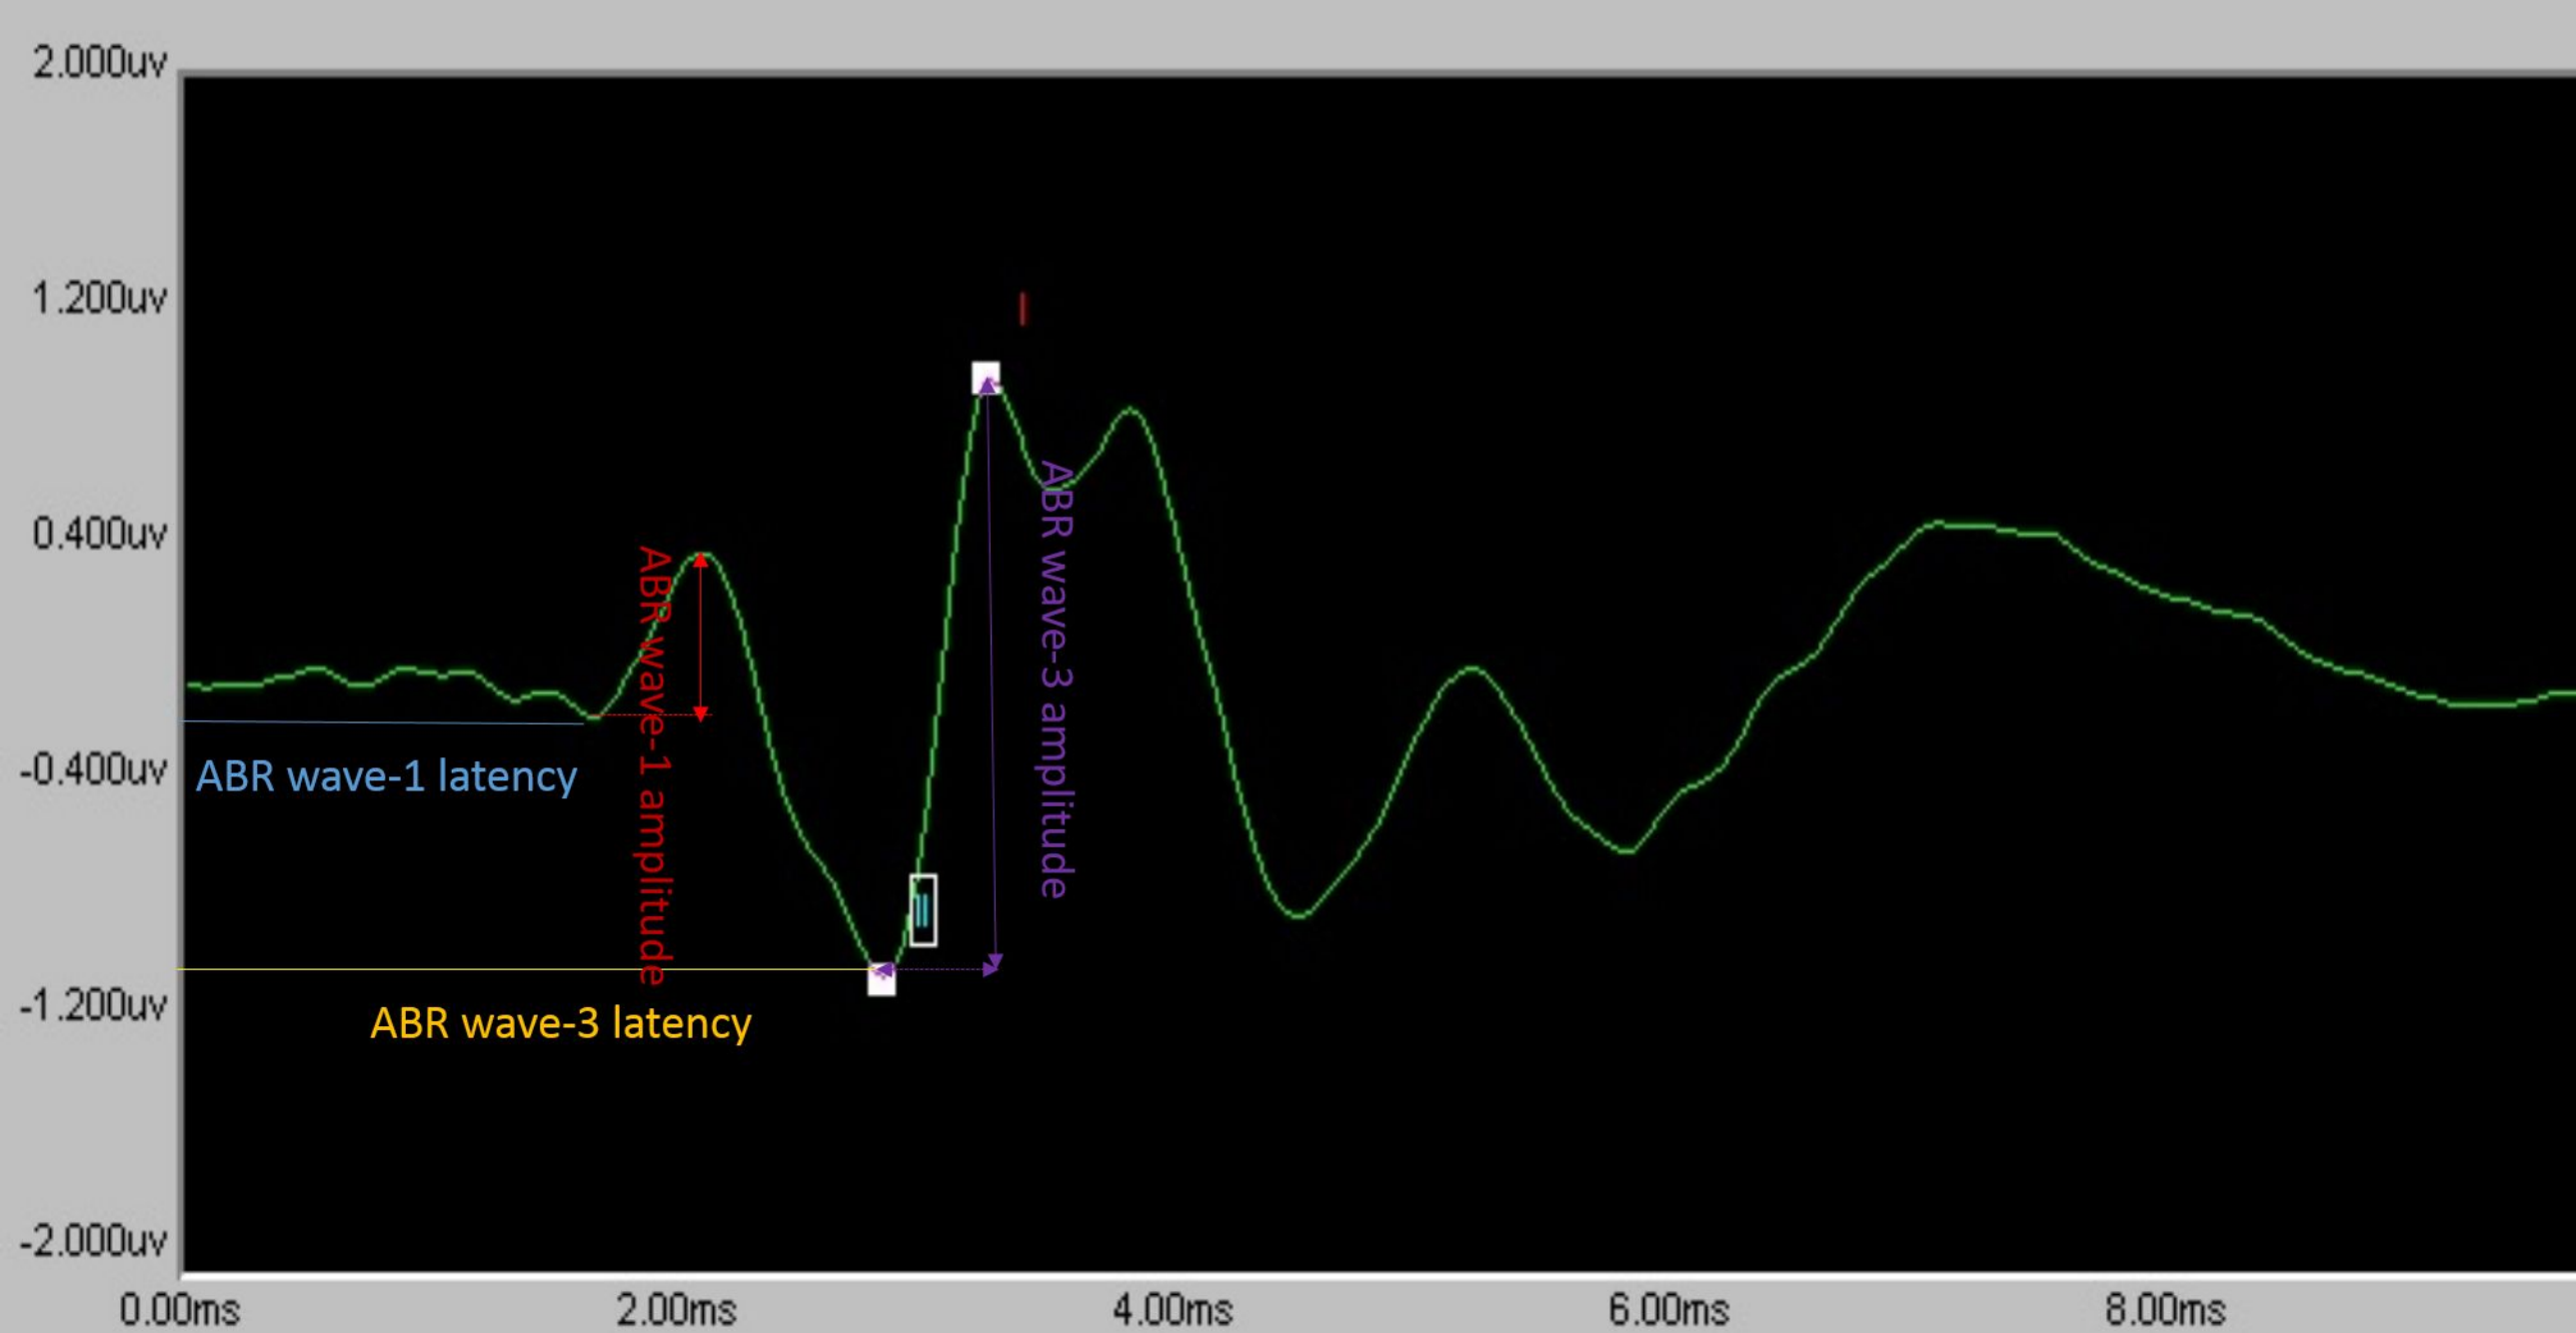

Supplement: BSR-2020-1637_supp.pdf [file BSR-2020-1637_supp.pdf]
